# Supplementary material for: Association of Periodontal Disease with the Occurrence of Unruptured Cerebral Aneurysm among Adults in Korea: A Nationwide Population-Based Cohort Study
Source: MDPI journal article supplement (doi:10.3390/medicina57090910), 2021-08-30
Supplement: s1 [file s1]

## Method S1. Definition of comorbidity

Information on smoking status and alcohol intake were collected by questionnaire. Body mass index was defined as the participant's weight in kilograms divided by the square of the participant's height in meters. Regular physical activity was considered to be strenuous physical activity performed for at least 20 min more than once per week. Smoking status was categorized into none, former smoker and current smoker regardless of the amount of smoking. Socioeconomic status was dichotomized at the bottom 10%. Hypertension was defined using International Statistical Classification of Diseases Related Health Problems-10 (ICD-10) codes I10-I11 and the prescription of an antihypertensive agent with at least one claim per year. Diabetes mellitus was defined as main or secondary diagnosis of diabetes mellitus (ICD-10 codes E10-E14). Criteria for this diagnosis included at least one claim per year for both visiting an outpatient clinic and admission accompanied by prescription records for any hypoglycemic agents. Alternatively, at least one fasting plasma glucose  $\geq 126$  mg/dL. Dyslipidemia was defined using ICD-10 code E78 and the prescription of a lipid-lowering agent including statins with at least one claim per year. Kidney disease was identified by ICD-10 codes N18.1-N18.5 and N18.9 with at least one claim per year. Malignancy was defined by ICD-10 codes C00-D48 with at least one claim per year. Body mass index and blood and urine examination results were used with the baseline dataset [1].

## Reference

1. Park SY, Kim SH, Kang SH, Yoon CH, Lee HJ, Yun PY, et al. Improved oral hygiene care attenuates the cardiovascular risk of oral health disease: a population-based study from Korea. *Eur Heart J*. 2019;40:1138-45.

**Table S1. Multicollinearity assessment of the risk of unruptured cerebral aneurysm according to oral hygiene indicators.**

|  <p>Copyright: © 2021 by the authors. Licensee MDPI, Basel, Switzerland.<br/>This article is an open access article distributed under the terms and<br/>conditions of the Creative Commons Attribution (CC BY) license<br/>(<a href="http://creativecommons.org/licenses/by/4.0/">http://creativecommons.org/licenses/by/4.0/</a>).</p> |  | Variance Inflation Factors |
|--------------------------------------------------------------------------------------------------------------------------------------------------------------------------------------------------------------------------------------------------------------------------------------------------------------------------------------------------------------------------------------------------------------------------|--|----------------------------|
| Age (years)                                                                                                                                                                                                                                                                                                                                                                                                              |  | 1.129                      |
| Male sex                                                                                                                                                                                                                                                                                                                                                                                                                 |  | 1.381                      |
| Socioeconomic status, % (n)                                                                                                                                                                                                                                                                                                                                                                                              |  |                            |
| Fifth quintile (highest)                                                                                                                                                                                                                                                                                                                                                                                                 |  | -                          |
| Fourth quintile                                                                                                                                                                                                                                                                                                                                                                                                          |  | 1.224                      |
| Third quintile                                                                                                                                                                                                                                                                                                                                                                                                           |  | 1.231                      |
| Second quintile                                                                                                                                                                                                                                                                                                                                                                                                          |  | 1.217                      |
| First quintile (lowest)                                                                                                                                                                                                                                                                                                                                                                                                  |  | 1.228                      |
| Covered by medical aid                                                                                                                                                                                                                                                                                                                                                                                                   |  | 1.001                      |
| Regular physical activity                                                                                                                                                                                                                                                                                                                                                                                                |  | 1.012                      |
| Alcohol intake                                                                                                                                                                                                                                                                                                                                                                                                           |  | 1.243                      |
| Smoking status                                                                                                                                                                                                                                                                                                                                                                                                           |  |                            |
| Former smoker                                                                                                                                                                                                                                                                                                                                                                                                            |  | 1.104                      |
| Current smoker                                                                                                                                                                                                                                                                                                                                                                                                           |  | 1.237                      |
| Body mass index (kg/m <sup>2</sup> )                                                                                                                                                                                                                                                                                                                                                                                     |  | 1.087                      |
| Comorbidities                                                                                                                                                                                                                                                                                                                                                                                                            |  |                            |
| Hypertension                                                                                                                                                                                                                                                                                                                                                                                                             |  | 1.864                      |
| Diabetes mellitus                                                                                                                                                                                                                                                                                                                                                                                                        |  | 1.275                      |
| Dyslipidemia                                                                                                                                                                                                                                                                                                                                                                                                             |  | 1.249                      |
| Renal disease                                                                                                                                                                                                                                                                                                                                                                                                            |  | 1.019                      |
| History of malignancy                                                                                                                                                                                                                                                                                                                                                                                                    |  | 1.018                      |
| Laboratory findings                                                                                                                                                                                                                                                                                                                                                                                                      |  |                            |
| Total cholesterol                                                                                                                                                                                                                                                                                                                                                                                                        |  | 1.378                      |

---

|                                  |       |
|----------------------------------|-------|
| Fasting blood glucose level      | 1.273 |
| Aspartate aminotransferase       | 1.142 |
| Alanine aminotransferase         | 1.189 |
| Gamma-glutamyl transferase       | 1.249 |
| Proteinuria                      | 1.014 |
| Oral health status               |       |
| Presence of periodontal disease  | 1.118 |
| Number of lost teeth             |       |
| 0                                | -     |
| 1-5                              | 1.044 |
| ≥6                               | 1.124 |
| Tooth brushing frequency per day |       |
| 0-1                              | -     |
| 2                                | 2.013 |
| ≥3                               | 2.198 |
| Dental visits for any reason     | 1.487 |
| Expert teeth scaling             | 1.514 |

---

**Table S2. Comparison of demographic data between included and excluded participants.**

| Characteristics          | Included participants | Excluded participants | <i>p</i> value | Standardized difference |
|--------------------------|-----------------------|-----------------------|----------------|-------------------------|
| Number of participants   | 209,620               | 305,246               |                |                         |
| Age (years)              | 53.7 ± 8.7            | 53.8 ± 9.8            | <.0001         | 0.051                   |
| Male sex                 | 124,496 (59.4)        | 180,095 (59.0)        | 0.005          | -0.097                  |
| Socioeconomic status     |                       |                       | <.0001         | 0.124                   |
| Fifth quintile (highest) | 83,828 (40.0)         | 93,100 (30.5)         |                |                         |
| Fourth quintile          | 41,931 (20.0)         | 63,796 (20.9)         |                |                         |
| Third quintile           | 29,697 (14.2)         | 50,976 (16.7)         |                |                         |
| Second quintile          | 26,563 (12.7)         | 47,924 (15.7)         |                |                         |
| First quintile (lowest)  | 27,171 (13.0)         | 49,145 (16.1)         |                |                         |
| Covered by medical aid   | 430 (0.2)             | 350 (0.1)             |                |                         |

*p* value by Student's *t*-test and Chi-square test

Data are expressed as the mean ± standard deviation, or *n* (%).

**Table S3. Baseline characteristics between participants with and without periodontal disease.**

| Characteristics           | Periodontal disease |               | <i>p</i> value |
|---------------------------|---------------------|---------------|----------------|
|                           | No                  | Yes           |                |
| Number of participants    | 165,814             | 43,806        |                |
| Age (years)               | 53.5 ± 8.8          | 54.3 ± 8.2    | <.001          |
| Male sex                  | 95,102 (57.4)       | 29,394 (67.1) | <.001          |
| Socioeconomic status      |                     |               | <.001          |
| Fifth quintile (highest)  | 63,891 (38.5)       | 19,937 (45.5) |                |
| Fourth quintile           | 33,319 (20.1)       | 8,612 (19.7)  |                |
| Third quintile            | 24,060 (14.5)       | 5,637 (12.9)  |                |
| Second quintile           | 21,855 (13.2)       | 4,708 (10.7)  |                |
| First quintile (lowest)   | 22,310 (13.5)       | 4,861 (11.1)  |                |
| Covered by medical aid    | 379 (0.2)           | 51 (0.1)      |                |
| Regular physical activity | 16,476 (9.9)        | 4,779 (10.9)  | <.001          |

|                                      |                |               |       |
|--------------------------------------|----------------|---------------|-------|
| Alcohol intake                       | 71,754 (43.3)  | 20,907 (47.7) | <.001 |
| Body mass index (kg/m <sup>2</sup> ) | 23.9 ± 2.9     | 24.1 ± 2.8    | <.001 |
| Systolic blood pressure (mmHg)       | 125.8 ± 16.8   | 125.8 ± 16.0  | 0.876 |
| Diastolic blood pressure (mmHg)      | 78.6 ± 10.8    | 78.6 ± 10.5   | 0.522 |
| Comorbidities                        |                |               |       |
| Hypertension                         | 60,610 (36.6)  | 17,007 (38.8) | <.001 |
| Diabetes mellitus                    | 15,575 (9.4)   | 5,725 (13.1)  | <.001 |
| Dyslipidemia                         | 29,483 (17.8)  | 8,890 (20.3)  | <.001 |
| Current smoker                       | 33,726 (20.3)  | 10,695 (24.4) | <.001 |
| Renal disease                        | 436 (0.3)      | 150 (0.3)     | 0.005 |
| History of malignancy                | 18,768 (11.3)  | 6,577 (15.0)  | <.001 |
| Laboratory findings                  |                |               |       |
| Total cholesterol (mg/dL)            | 197.8 ± 36.3   | 197.7 ± 36.2  | 0.557 |
| Fasting blood glucose level (mg/dL)  | 97.3 ± 26.9    | 99.7 ± 29.0   | <.001 |
| Aspartate aminotransferase (U/L)     | 26.5 ± 16.2    | 26.6 ± 15.5   | 0.299 |
| Alanine aminotransferase (U/L)       | 25.4 ± 20.0    | 26.2 ± 20.3   | <.001 |
| Gamma-glutamyl transferase (U/L)     | 38.1 ± 55.3    | 40.0 ± 51.4   | <.001 |
| Proteinuria (≥1+ in dip stick test)  | 5,315 (3.2)    | 1,524 (3.5)   | 0.004 |
| Oral hygiene parameters              |                |               |       |
| Number of lost teeth                 |                |               | <.001 |
| 0                                    | 127,105 (76.7) | 31,008 (70.8) |       |
| 1-5                                  | 32,208 (19.4)  | 11,083 (25.3) |       |
| ≥6                                   | 6,501 (3.9)    | 1,715 (3.9)   |       |
| Tooth brushing frequency per day     |                |               | <.001 |
| 0-1                                  | 24,312 (14.7)  | 5,571 (12.7)  |       |
| 2                                    | 74,067 (44.7)  | 17,559 (40.1) |       |
| ≥3                                   | 67,435 (40.7)  | 20,676 (47.2) |       |
| Dental visits for any reason         | 63,675 (38.4)  | 28,965 (66.1) | <.001 |
| Expert teeth scaling                 | 35,711 (21.5)  | 18,544 (42.3) | <.001 |

**Note:** p value by Student's t-test and Chi-square test. Data are expressed as the mean ± standard deviation, or *n* (%).

**Table S4.** The subgroup analysis regarding periodontal disease and occurrence of unruptured cerebral aneurysm according to age and sex.

|        | Model 1          |                                       | Model 2          |                                       | Model 3          |                                       |
|--------|------------------|---------------------------------------|------------------|---------------------------------------|------------------|---------------------------------------|
|        | HR (95% CI)      | <i>p</i> value for interaction effect | HR (95% CI)      | <i>p</i> value for interaction effect | HR (95% CI)      | <i>p</i> value for interaction effect |
| Age    |                  | 0.542                                 |                  | 0.678                                 |                  | 0.798                                 |
| ≤51    | 1.12 (1.07-1.18) |                                       | 1.14 (1.10-1.21) |                                       | 1.14 (1.07-1.24) |                                       |
| ≥52    | 1.14 (0.99-1.06) |                                       | 1.15 (1.04-1.24) |                                       | 1.16 (1.08-1.23) |                                       |
| Sex    |                  | 0.872                                 |                  | 0.932                                 |                  | 0.913                                 |
| Male   | 1.05 (1.03-1.10) |                                       | 1.08 (1.05-1.13) |                                       | 1.09 (1.06-1.15) |                                       |
| Female | 1.10 (1.02-1.14) |                                       | 1.14 (1.06-1.21) |                                       | 1.13 (1.06-1.16) |                                       |

The multivariate model (1) was undertaken for the association of each oral hygiene parameter with the occurrence of unruptured cerebral aneurysm adjusted for socioeconomic status, regular physical activity, alcohol intake, smoking status, body mass index (kg/m<sup>2</sup>), hypertension, diabetes mellitus, dyslipidemia, renal disease, and history of malignancy

The multivariate model (2) was undertaken for the association of each oral hygiene parameter with the occurrence of unruptured cerebral aneurysm adjusted for the variables in model 1 as well as systolic blood pressure, total cholesterol, fasting blood glucose level, aspartate aminotransferase, alanine aminotransferase, gamma-glutamyl transferase, and proteinuria

The multivariate model (3) was undertaken for the association of each oral hygiene parameter with the occurrence of unruptured cerebral aneurysm adjusted for the variables in model 2 as well as overall oral hygiene indicators (presence of periodontal disease, number of lost teeth, tooth brushing frequency per day, dental visits for any reason, and expert teeth scaling).

HR, hazard ratio; CI, confidence interval.

**Table S5.** The subgroup analysis regarding periodontal disease and occurrence of unruptured cerebral aneurysm according to smoking status.

| Model 1        |                  |                                            | Model 2          |                                            | Model 3          |                                            |
|----------------|------------------|--------------------------------------------|------------------|--------------------------------------------|------------------|--------------------------------------------|
|                | HR (95% CI)      | <i>p</i> value for in-<br>teraction effect | HR (95% CI)      | <i>p</i> value for in-<br>teraction effect | HR (95% CI)      | <i>p</i> value for in-<br>teraction effect |
| Smoking status |                  | 0.768                                      |                  | 0.659                                      |                  | 0.713                                      |
| Former smoker  | 1.14 (1.05-1.25) |                                            | 1.11 (1.03-1.24) |                                            | 1.12 (1.05-1.21) |                                            |
| Current smoker | 1.25 (1.02-1.40) |                                            | 1.23 (1.05-1.44) |                                            | 1.22 (1.06-1.38) |                                            |

The multivariate model (1) was undertaken for the association of each oral hygiene parameter with the occurrence of unruptured cerebral aneurysm adjusted for socioeconomic status, regular physical activity, alcohol intake, smoking status, body mass index (kg/m<sup>2</sup>), hypertension, diabetes mellitus, dyslipidemia, renal disease, and history of malignancy

The multivariate model (2) was undertaken for the association of each oral hygiene parameter with the occurrence of unruptured cerebral aneurysm adjusted for the variables in model 1 as well as systolic blood pressure, total cholesterol, fasting blood glucose level, aspartate aminotransferase, alanine aminotransferase, gamma-glutamyl transferase, and proteinuria

The multivariate model (3) was undertaken for the association of each oral hygiene parameter with the occurrence of unruptured cerebral aneurysm adjusted for the variables in model 2 as well as overall oral hygiene indicators (presence of periodontal disease, number of lost teeth, tooth brushing frequency per day, dental visits for any reason, and expert teeth scaling).

HR, hazard ratio; CI, confidence interval
